# Supplementary material for: Adsorption Mechanism of Eco-Friendly Corrosion Inhibitors for Exceptional Corrosion Protection of Carbon Steel: Electrochemical and First-Principles DFT Evaluations
Source: MDPI journal article supplement (doi:10.3390/met12101598), 2022-09-25
Supplement: s1 [file s1]

# Adsorption Mechanism of Eco-Friendly Corrosion Inhibitors for Exceptional Corrosion Protection of Carbon Steel: Electrochemical and First-Principles DFT Evaluations

Abdelkarim Chaouiki <sup>1,†</sup>, Maryam Chafiq <sup>1,†</sup>, Young Gun Ko <sup>1,\*</sup>, Aisha H. Al-Moubaraki <sup>2</sup>, Fatima Zahra Thari <sup>3</sup>, Rachid Salghi <sup>4</sup>, Khalid Karrouchi <sup>5</sup>, Khalid Bougrin <sup>3,6</sup>, Ismat H. Ali <sup>7</sup> and Hassane Lgaz <sup>8,\*</sup>

<sup>1</sup> Materials Electrochemistry Laboratory, School of Materials Science and Engineering, Yeungnam University, Gyeongsan 38541, Korea

<sup>2</sup> Department of Chemistry, Faculty of Sciences—Alfaisaliah Campus, University of Jeddah, Jeddah 21589, Saudi Arabia

<sup>3</sup> Equipe de Chimie des Plantes et de Synthèse Organique et Bioorganique, URAC23, Faculty of Science, B.P. 1014, Geophysics, Natural Patrimony and Green Chemistry (GEOPAC) Research Center, Mohammed V University, Rabat 10100, Morocco

<sup>4</sup> Laboratory of Applied Chemistry and Environment, ENSA, University Ibn Zohr, P.O. Box 1136, Agadir 80000, Morocco

<sup>5</sup> Laboratory of Analytical Chemistry and Bromatology, Faculty of Medicine and Pharmacy, Mohamed V University, Rabat 10100, Morocco

<sup>6</sup> Department of Chemical and Biochemical Sciences-Green Process Engineering (CBS-GPE), Mohammed VI Polytechnic University (UM6P), Ben Guerir 43150, Morocco

<sup>7</sup> Department of Chemistry, College of Science, King Khalid University, P.O. Box 9004, Abha 61413, Saudi Arabia

<sup>8</sup> Innovative Durable Building and Infrastructure Research Center, Center for Creative Convergence Education, Hanyang University ERICA, 55 Hanyangdaehak-ro, Sangrok-gu, Ansan-si 15588, Korea

\* Correspondence: younggun@ynu.ac.kr (Y.G.K.); hlgaz@hanyang.ac.kr (H.L.)

† These authors contributed equally to this work.

## Synthesis of inhibitor molecules

The title compounds described here were synthesized according to the literature procedures [17]. Briefly, an equimolar mixture of thiazolidine-2,4-dione (**1**) (0.12 g, 1 mmol), 4-methoxybenzaldehyde (**2a**) or 4-methylbenzaldehyde (**2b**) (1 mmol) in water/ethanol (v/v, 2:1) (10 ml) was treated with sodium hydroxide (1.1 mmol) at 5°C, then stirred for 5–6 h at room temperature (Scheme 1). The completion of the reaction was monitored by TLC. The reaction mixture was acidified with diluted HCl. The solid was filtered and recrystallized from ethanol to give pure product MeOTZD and MeTZD. Their characterization is reported in supplementary material.

### Synthesis of 5-(4-methoxybenzylidene) thiazolidine-2,4-dione (MeOTZD).

White solid, Yield = 92%. mp = 216–218°C (EtOH); TLC (cyclohexane–AcOEt: 70–30),  $R_f$  = 0.33; <sup>1</sup>H NMR (200 MHz, DMSO-*d*<sub>6</sub>)  $\delta$  (ppm) = 12.48 (s, 1H), 7.67 (s, 1H), 7.47 (d,  $J$  = 8.7 Hz, 2H), 7.02 (d,  $J$  = 8.7 Hz, 2H), 3.77 (s, 3H); <sup>13</sup>C NMR (50 MHz, DMSO)  $\delta$  (ppm) = 167.88, 167.34, 160.88, 131.99  $\times$  2, 131.75, 125.39, 120.15, 114.78  $\times$  2, 55.37; MS (ESI<sup>+</sup>):  $m/z$  = 236.4 [M+H]<sup>+</sup>.

### Synthesis of (Z)-5-(4-methylbenzylidene) thiazolidine-2,4-dione (MeTZD).

White solid, Yield = 50%; mp 229–231°C; TLC (cyclohexane–AcOEt: 70–30),  $R_f$  = 0.46; <sup>1</sup>H NMR (200 MHz, DMSO-*d*<sub>6</sub>)  $\delta$ , ppm ( $J$ , Hz): 12.56 (1H, s, NH); 7.73 (1H, s, ArCH=C); 7.46 (2H, d,  $J$  = 4.4 Hz, H Ar); 7.32 (2H, d,  $J$  = 4.4 Hz, H Ar); 2.33 (3H, s, CH<sub>3</sub>). <sup>13</sup>C NMR (50 MHz, DMSO)  $\delta$ , ppm: 167.8 (C=O); 167.3 (C=O); 140.6 (C=CH); 131.8 (C-4 Ar); 130.2 (C-1 Ar); 130.0 (C-2 Ar); 129.8 (C-3 Ar); 122.2 (C-5 TZD); 21.0 (CH<sub>3</sub>). MS (ESI<sup>+</sup>):  $m/z$  = 220.2 [M+H]<sup>+</sup>.

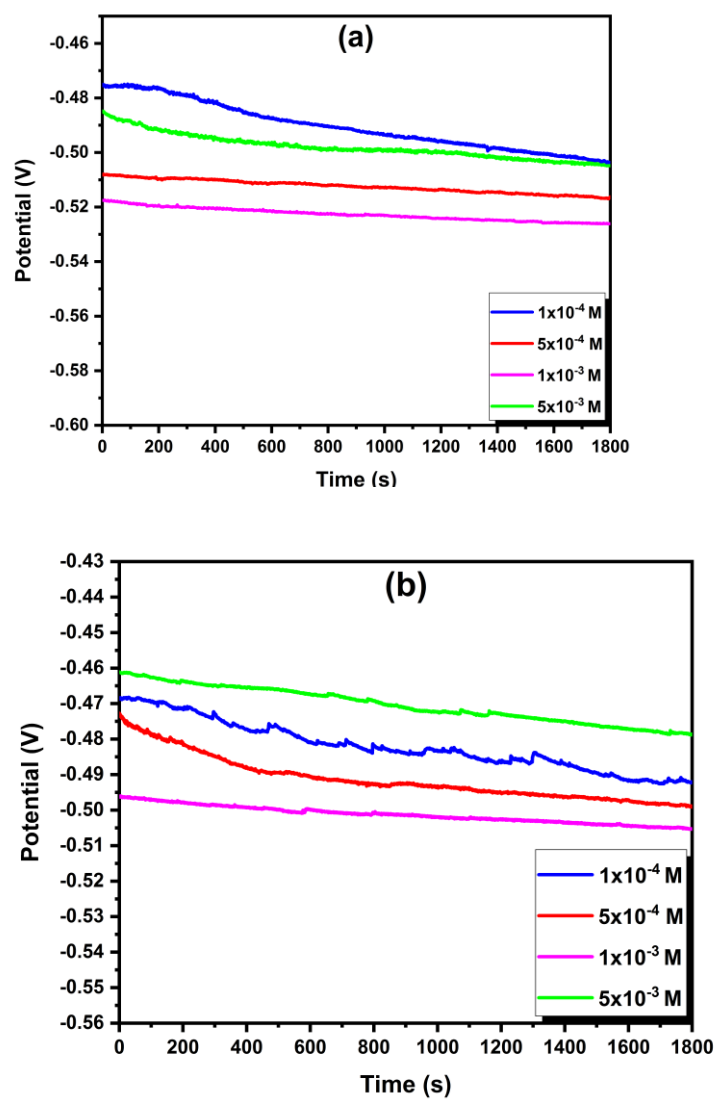

**Figure S1.** The variation of open circuit potential as function of time of MeOTZD (a) and MeTZD (b).

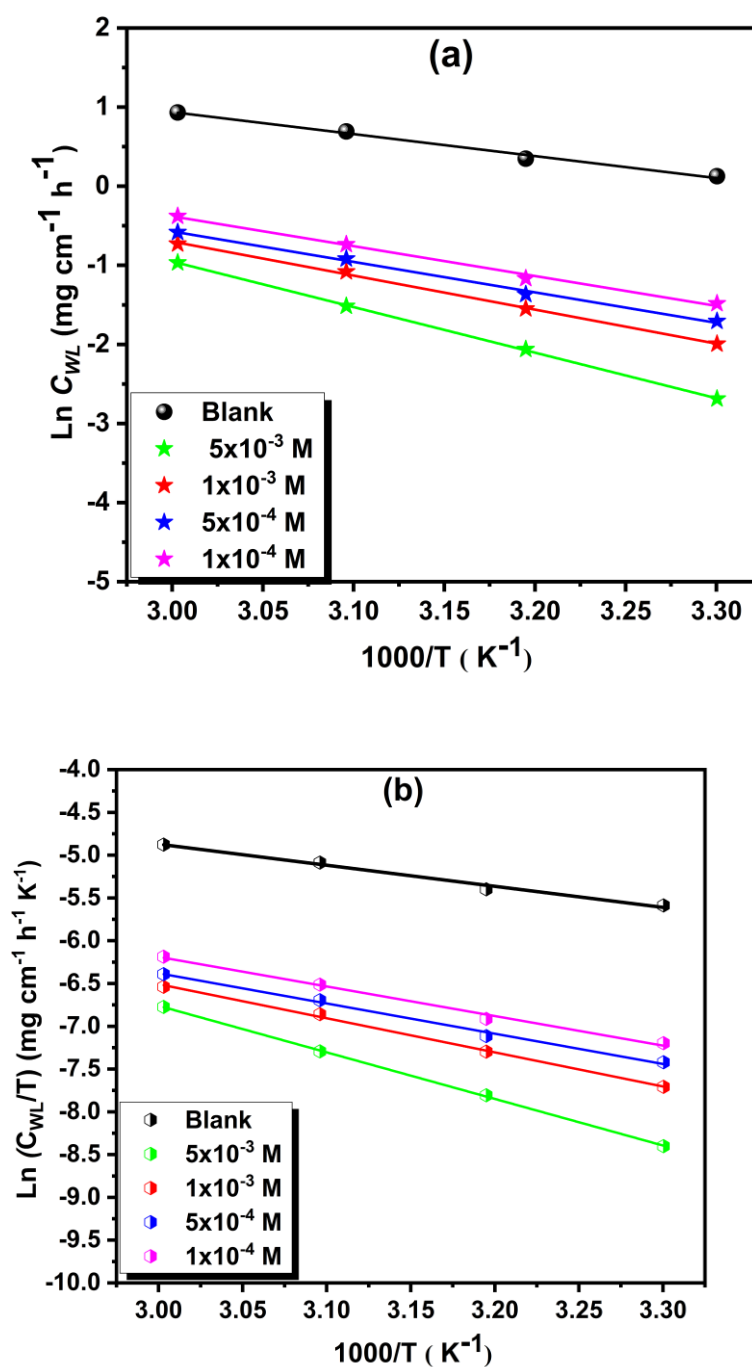

**Figure S2.** Arrhenius (a) and transition state (b) plots for corrosion inhibition of carbon steel in absence and presence of different concentrations of MeOTZD in 1.0 M HCl.

**Table S1.** MeOTZD activation parameters.

|                                                       | Blank   | MeOTZD             |                    |                    |                    |
|-------------------------------------------------------|---------|--------------------|--------------------|--------------------|--------------------|
|                                                       |         | $5 \times 10^{-3}$ | $1 \times 10^{-3}$ | $5 \times 10^{-4}$ | $1 \times 10^{-4}$ |
| $E_a$<br>( $\text{kJ mol}^{-1}$ )                     | 23.126  | 47.9021            | 35.7905            | 32.031             | 31.3909            |
| $\Delta H_a$<br>( $\text{kJ mol}^{-1}$ )              | 20.488  | 45.2629            | 33.1513            | 29.3917            | 28.7516            |
| $\Delta S_a$<br>( $\text{J mol}^{-1} \text{K}^{-1}$ ) | -176.49 | -117.87            | -152.1             | -162.32            | -162.65            |

| $E_a - \Delta H_a$<br>( $\text{kJmol}^{-1}$ ) | 43.614 | 2.63928 | 2.6392 | 2.63928 | 2.63928 |
|-----------------------------------------------|--------|---------|--------|---------|---------|
|-----------------------------------------------|--------|---------|--------|---------|---------|

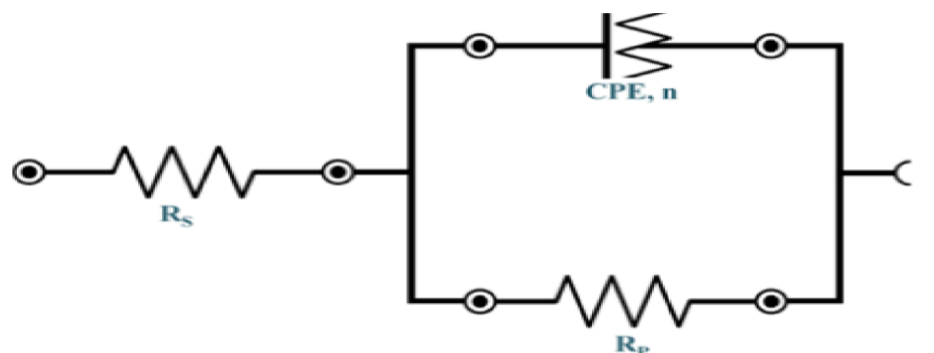

Figure S3. Equivalent circuit model applied to fit and simulate the impedance data.

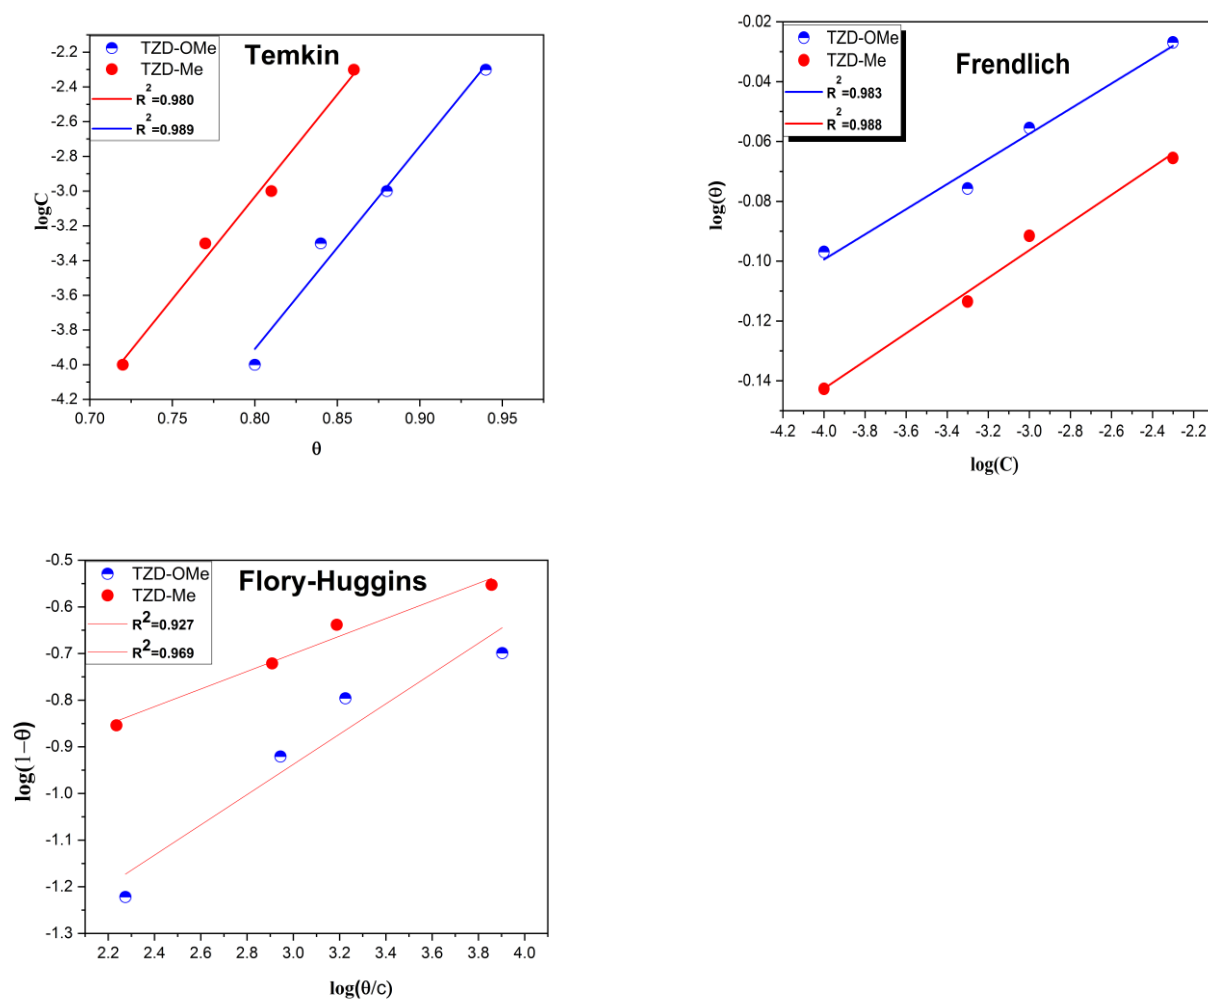

Figure 4. S: Isotherm plots for carbon steel in 1.0 M HCl medium at 303 K containing different concentrations of MeOTZD and MeTZD.
